# Supplementary material for: Is Forced Migration a Barrier to Treatment Success? Similar HIV Treatment Outcomes Among Refugees and a Surrounding Host Community in Kuala Lumpur, Malaysia
Source: Springer Nature journal article supplement (doi:10.1007/s10461-013-0494-0), 2013-06-08
Supplement: MOESM1 [file 10461_2013_494_MOESM1_ESM.pdf]

## SUPPLEMENTARY MATERIAL

**Table i: Comparison of interviewed and randomly sampled host community clients using data from electronic medical records\***

| Factor                                                                               | Interviewed sample (n <sub>1</sub> ) | Random sample (n <sub>2</sub> ) | p-value  |
|--------------------------------------------------------------------------------------|--------------------------------------|---------------------------------|----------|
| Female/transgender, n (%)                                                            | 33/144 (23)                          | 32/150 (21)                     | 0.74††   |
| Age in years, median (IQR) (n <sub>1</sub> =148; n <sub>2</sub> =150)                | 42 (34, 49)                          | 39 (35, 48)                     | 0.35‡    |
| Marital status, n (%)                                                                |                                      |                                 |          |
| Single                                                                               | 63/141 (45)                          | 52/115 (45)                     | 0.14†    |
| Married                                                                              | 68/141 (48)                          | 61/115 (53)                     |          |
| Divorced/widowed                                                                     | 10/141 ( 7)                          | 2/115 ( 2)                      |          |
| Ethnicity, n (%)                                                                     |                                      |                                 |          |
| Chinese                                                                              | 88/145 (61)                          | 50/140 (36)                     | <0.001†† |
| Malay                                                                                | 36/145 (25)                          | 56/140 (40)                     |          |
| Tamil/Other                                                                          | 21/145 (15)                          | 34/140 (24)                     |          |
| Most recent routine viral load, copies/mL (%)                                        |                                      |                                 |          |
| Suppressed <40                                                                       | 111/146 (76)                         | 105/139 (76)                    | 0.92††   |
| Not suppressed ≥40                                                                   | 35/146 (24)                          | 34/139 (25)                     |          |
| Recent routine CD4, median cells/μL (IQR) (n <sub>1</sub> =144; n <sub>2</sub> =149) | 376 (248, 598)                       | 350 (202, 486)                  | 0.07‡    |
| Time on HAART, median weeks (IQR) (n <sub>1</sub> =140; n <sub>2</sub> =130)         | 184 (59, 324)                        | 134 (66, 259)                   | 0.09‡    |

†Fisher's exact test ††Chi-squared test ‡Mann-Whitney test

**Table ii: Unsuppressed viral load by type of adherence measurement, stratified by refugee status (≥25 weeks on treatment)**

| Adherence measurement                              | ≥40 copies/mL, n (%) | Total     | p-value† |
|----------------------------------------------------|----------------------|-----------|----------|
| <b>Host</b>                                        |                      |           |          |
| Dose-by-dose self-report (4 days); n=125           |                      |           |          |
| 0+                                                 | 2 (50)               | 4 (100)   | 0.06     |
| 80+                                                | 0 ( 0)               | 0 ( 0)    |          |
| 95+                                                | 18 (15)              | 121 (100) |          |
| Visual analogue scale self-report (1 month); n=125 |                      |           |          |
| 0+                                                 | 5 (45)               | 11 (100)  | 0.002    |
| 80+                                                | 6 (22)               | 27 (100)  |          |
| 95+                                                | 9 (10)               | 87 (100)  |          |
| Pharmacy claim adherence (24 months); n=121        |                      |           |          |
| 0+                                                 | 4 (31)               | 13 (100)  | 0.10     |
| 80+                                                | 5 (16)               | 32 (100)  |          |
| 95+                                                | 9 (12)               | 76 (100)  |          |
| <b>Refugee</b>                                     |                      |           |          |
| Dose-by-dose self-report (4 days); n=152           |                      |           |          |
| 0+                                                 | 3 ( 50)              | 6 (100)   | 0.07     |
| 80+                                                | 0 ( 0)               | 1 (100)   |          |
| 95+                                                | 20 ( 17)             | 114 (100) |          |
| Visual analogue scale self-report (1 month); n=121 |                      |           |          |
| 0+                                                 | 3 (43)               | 7 (100)   | 0.06     |
| 80+                                                | 6 (25)               | 24 (100)  |          |
| 95+                                                | 14 (16)              | 90 (100)  |          |
| Pharmacy claim adherence (24 months); n=113        |                      |           |          |
| 0+                                                 | 4 (44)               | 9 (100)   | 0.004    |
| 80+                                                | 8 (32)               | 25 (100)  |          |
| 95+                                                | 10 (13)              | 79 (100)  |          |

---

†Chi-squared test for trend (Cochran-Armitage test)
